# Supplementary figures and images for: Immersive virtual reality for older adults with mild cognitive impairment, dementia, or cognitive frailty: a systematic review and narrative synthesis (2019–2025)
Source: Research Square preprint supplement (doi:10.21203/rs.3.rs-7895384/v1), 2025-12-17

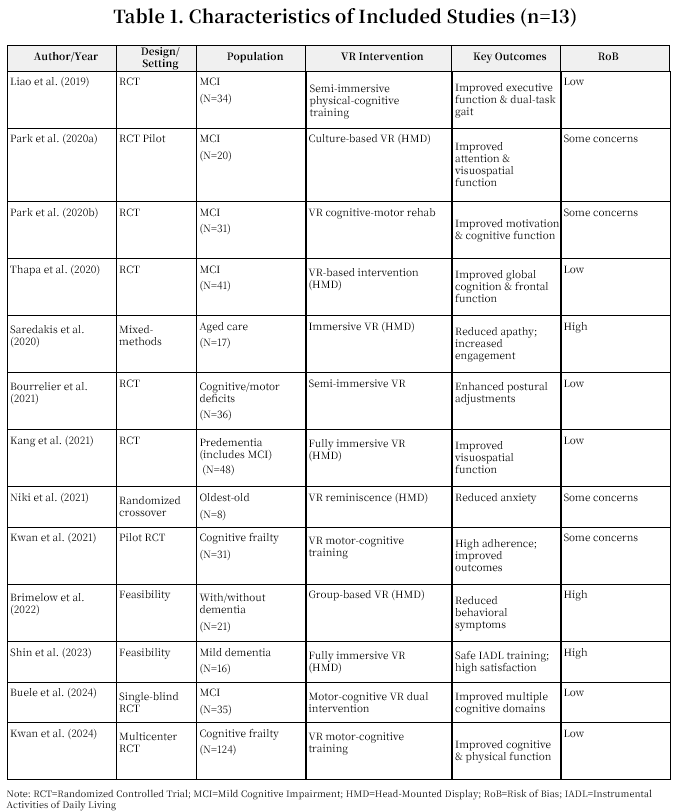

Supplement: Supplementary file 1 [file 36dc0f48db56cf5c010619f8.docx]

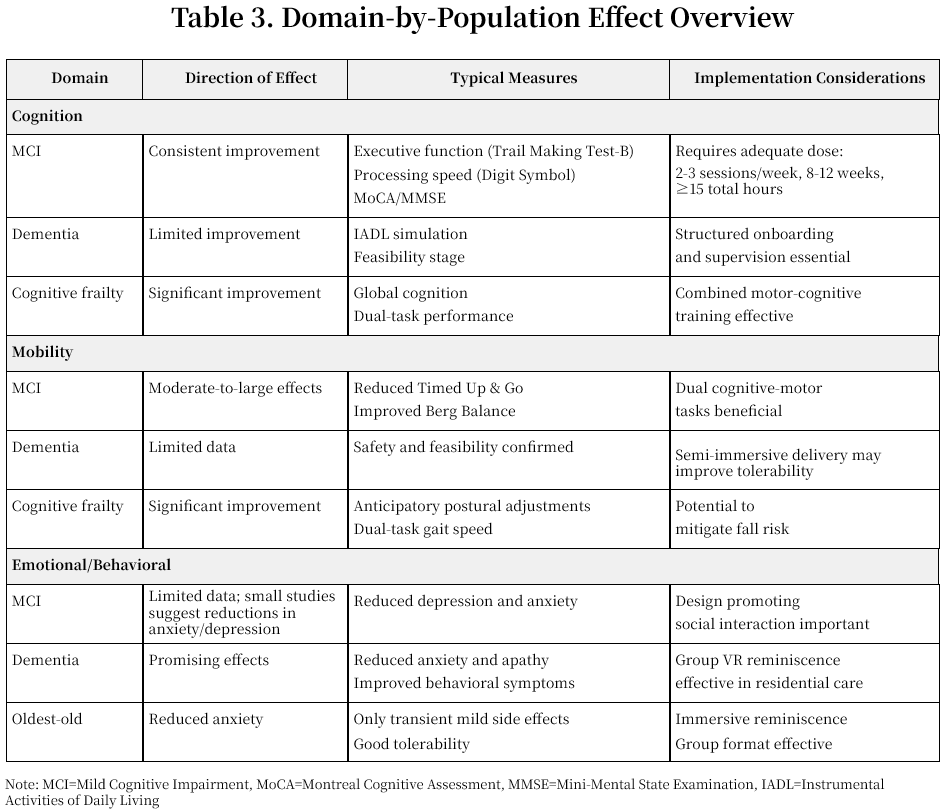

Supplement: Supplementary file 2 [file 6f7c364ab6f7aa51e0bfbe20.docx]

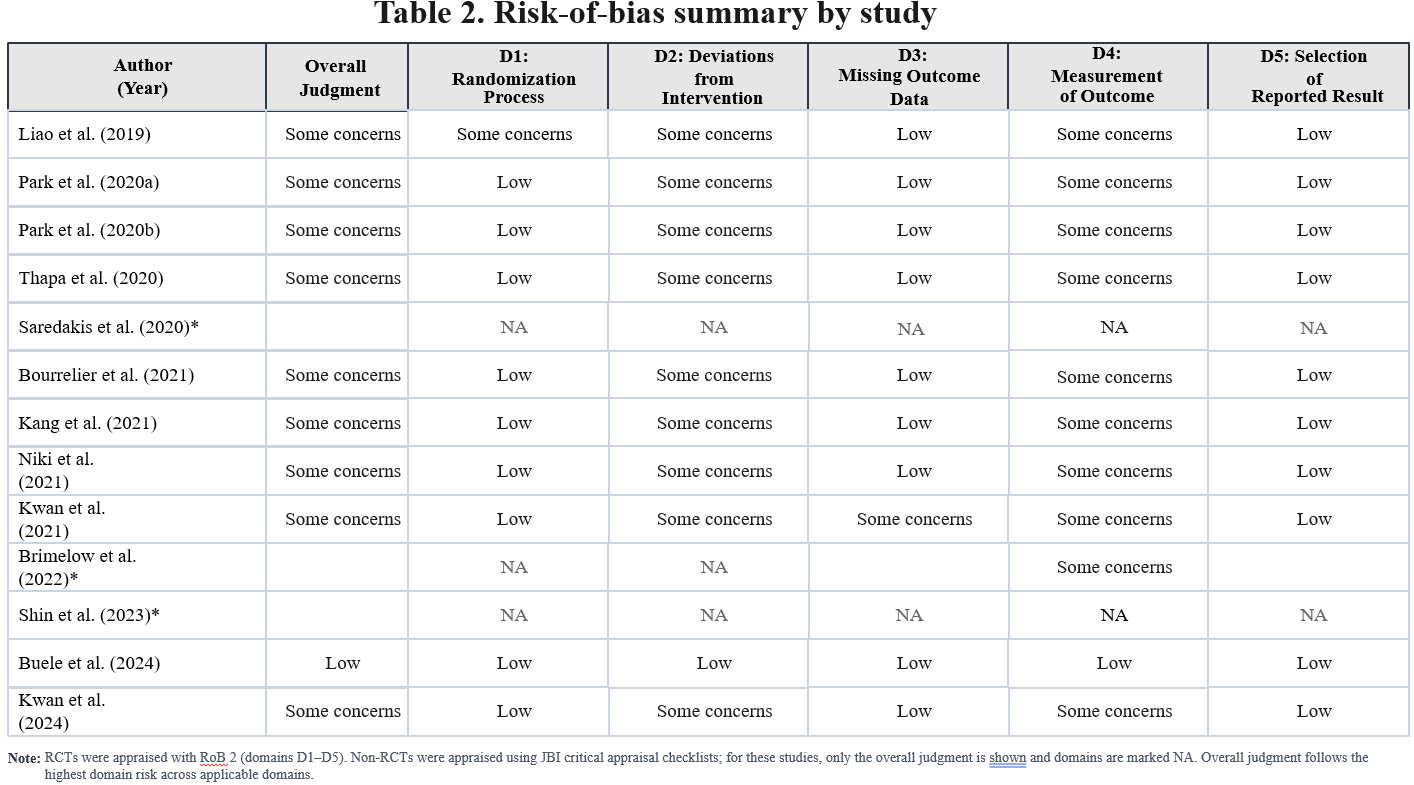

Supplement: Supplementary file 3 [file 73b67f30ba9229eb51e6381c.docx]
